# Supplementary material
Source: PubMed Central journal article supplement (PMC4543442)

## **Supplemental Material**

### **Supplemental Figure Legends**

**Figure S1. Nutlin inhibits  $\gamma$ H2AX foci formation and prolongs resolution.** (A)  $p53^{-/-}$  and (B)  $p53^{-/-}Mdm2^{-/-}$  MEFs were treated with Nutlin (10  $\mu$ M) or vehicle control (DMSO). MEFs with ectopic Mdm2 overexpression served as a positive control. Following exposure to 5 Gy of  $\gamma$ IR, MEFs were fixed at the indicated intervals and immunofluorescence for  $\gamma$ H2AX was performed. DAPI was used to visualize the nucleus. Representative images are shown.

**Figure S2. Inhibition of pS/TQ foci formation and resolution by Nutlin.** (A)  $p53^{-/-}$  and (B)  $p53^{-/-}Mdm2^{-/-}$  MEFs were treated with Nutlin (10 $\mu$ M) or vehicle control (DMSO). MEFs with ectopic Mdm2 overexpression served as a positive control. Following exposure to 5 Gy of  $\gamma$ IR, cells were fixed at the indicated intervals and immunofluorescence for pS/TQ was performed. DAPI was used to visualize the nucleus. Representative images are shown.

**Figure S3. Nutlin inhibits  $\gamma$ H2AX foci formation and resolution in ovarian cancer cells.** SKOV-3 (A), OVCAR-5 (B) and OVCAR-8 (C) ovarian cancer cells were treated with Nutlin (10 $\mu$ M) or vehicle control (DMSO). Following exposure to 5 Gy of  $\gamma$ IR, cells were fixed at the indicated intervals and immunofluorescence for  $\gamma$ H2AX was performed. DAPI was used to visualize the nucleus. Representative images are shown.

**Figure S4. Nutlin cooperates with genotoxic agents in p53-inactivated ovarian cancer cells.** The indicated ovarian cancer cell lines were treated with the indicated drug(s) or vehicle control

(DMSO). Nutlin was always at 10  $\mu$ M. Cisplatin (A) or etoposide (B) was at 1 or 10  $\mu$ M. MTT assays were performed at intervals. Representative graphs of 3 independent experiments are shown. Error bars are SEM.

**Figure S5. Nutlin and DNA damaging drugs combine to kill ovarian cancer cells that harbor mutant p53.** OVCAR-5 (A) and OVCAR-8 (B) ovarian cancer cell lines were treated with vehicle control (DMSO) or 10  $\mu$ M Nutlin, 5  $\mu$ M cisplatin, 5  $\mu$ M etoposide or a combination of Nutlin with cisplatin or etoposide. After 48 hours, microscopic representative pictures were taken of each.

**A**

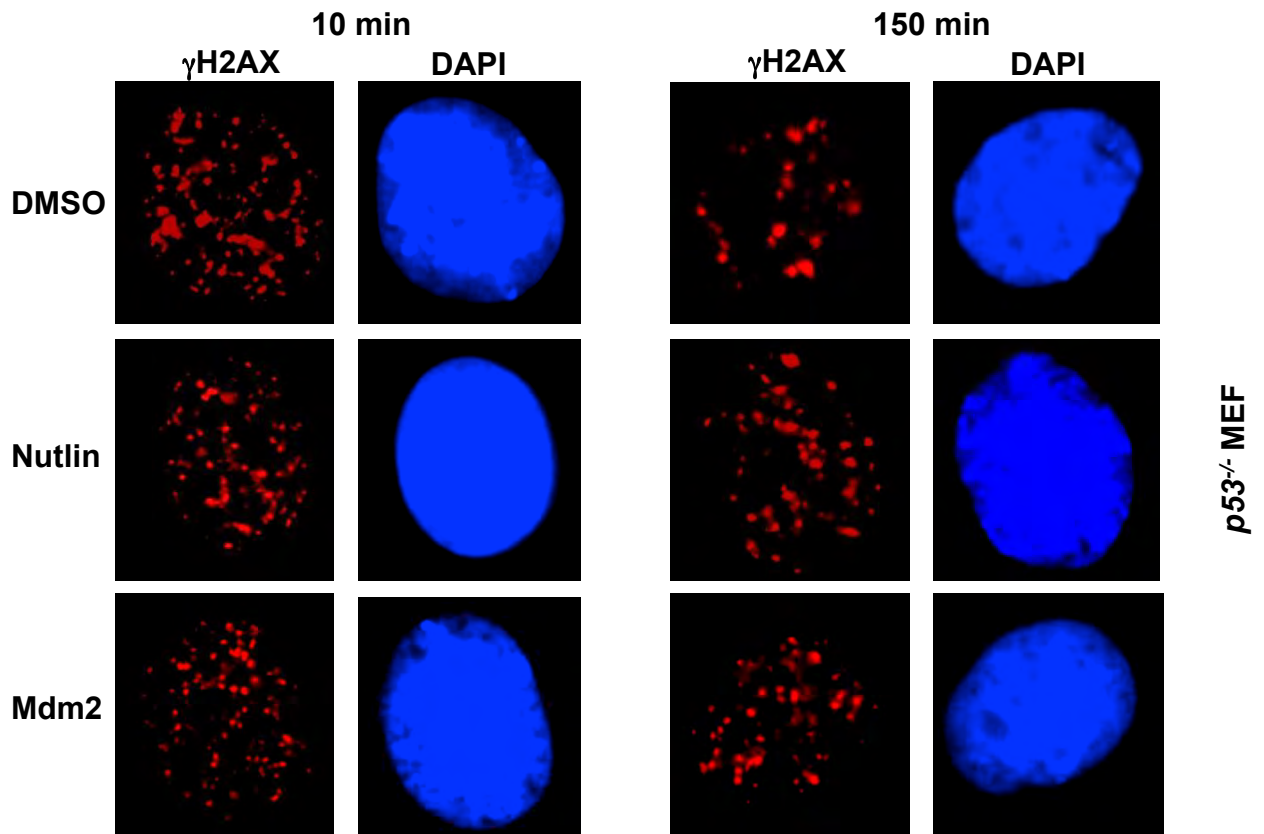

**B**

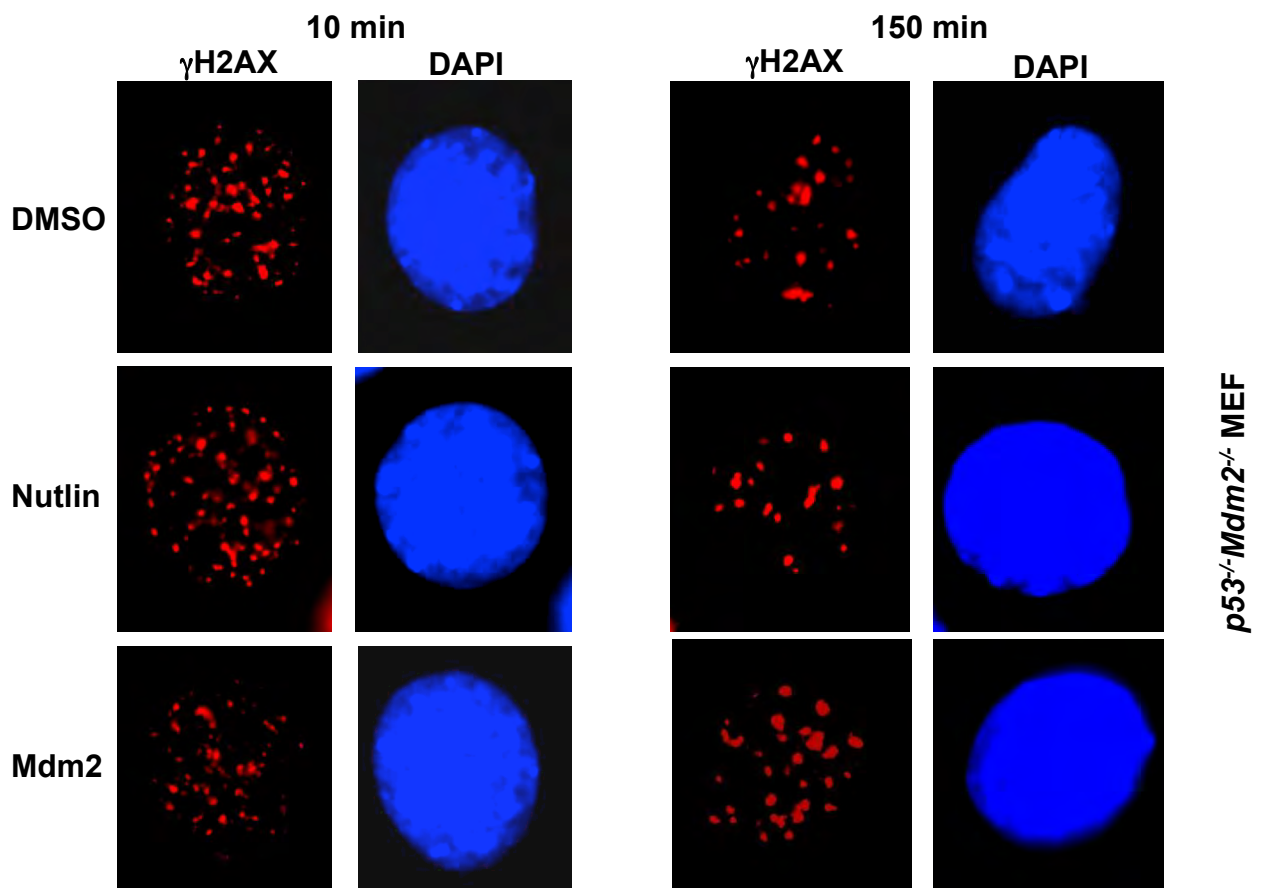

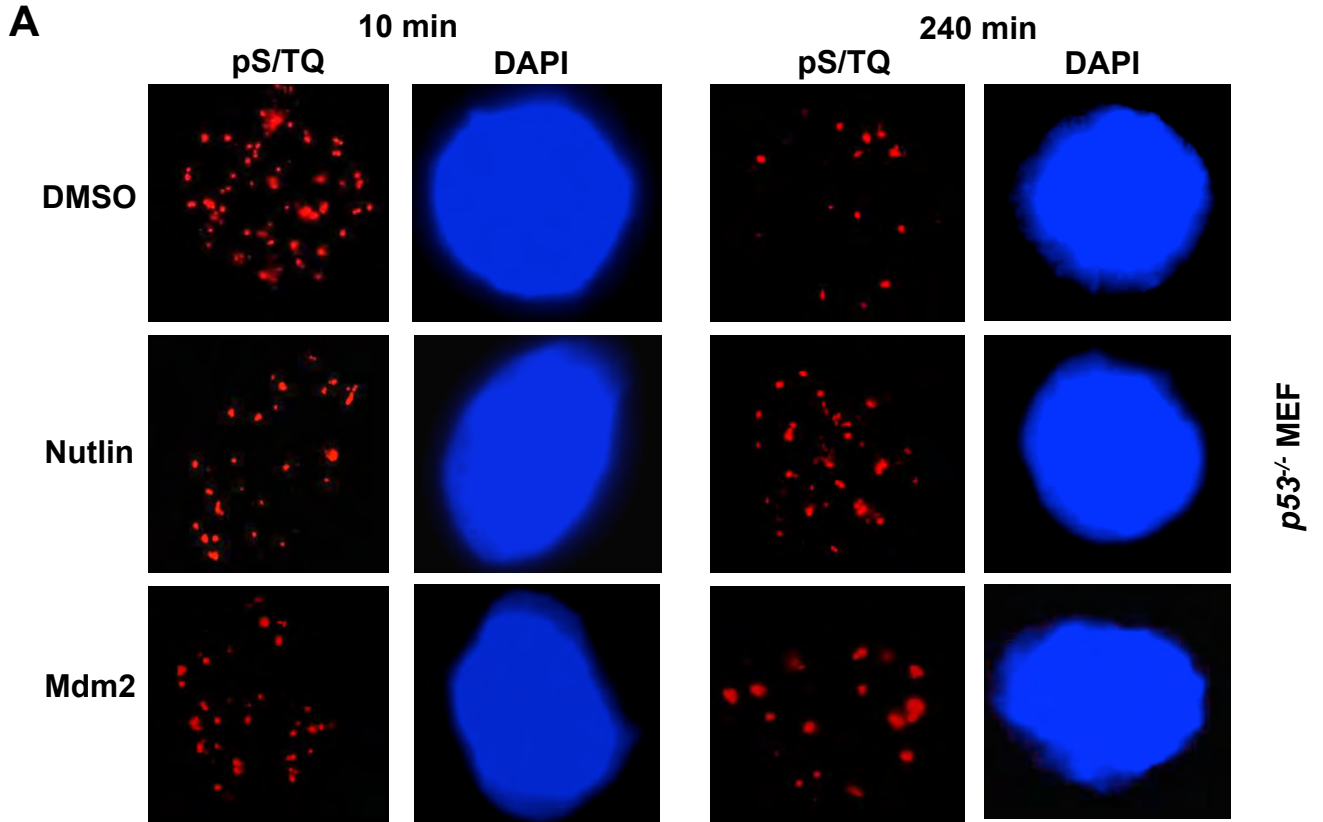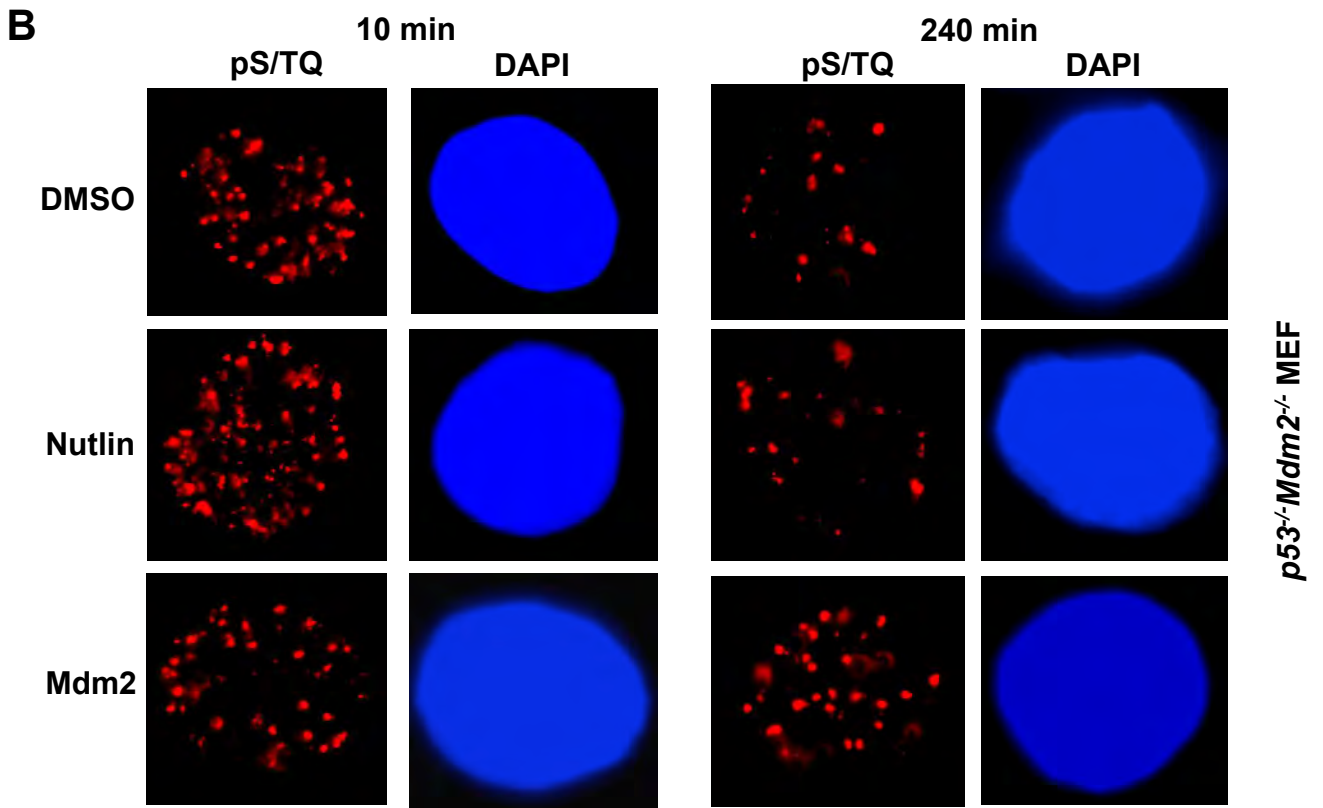

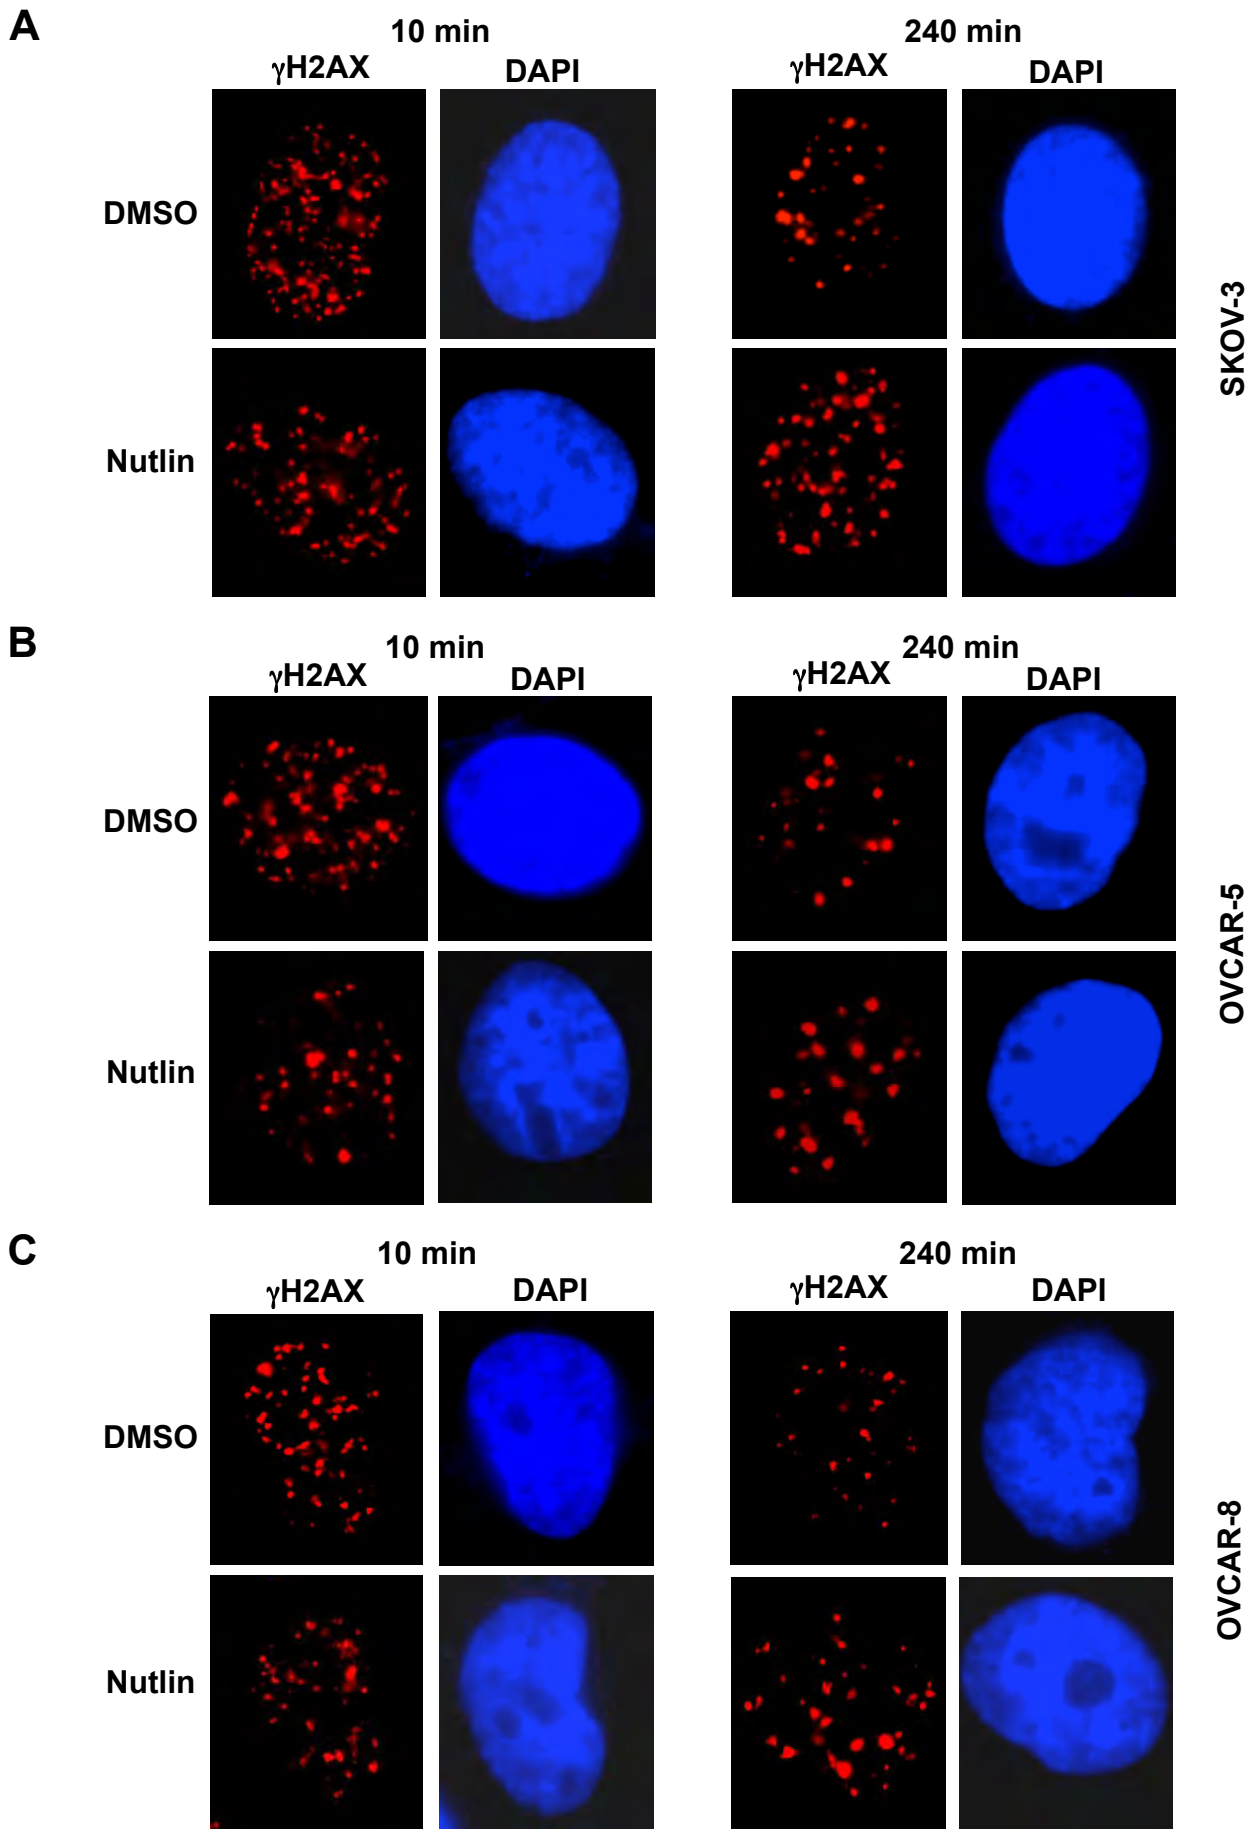

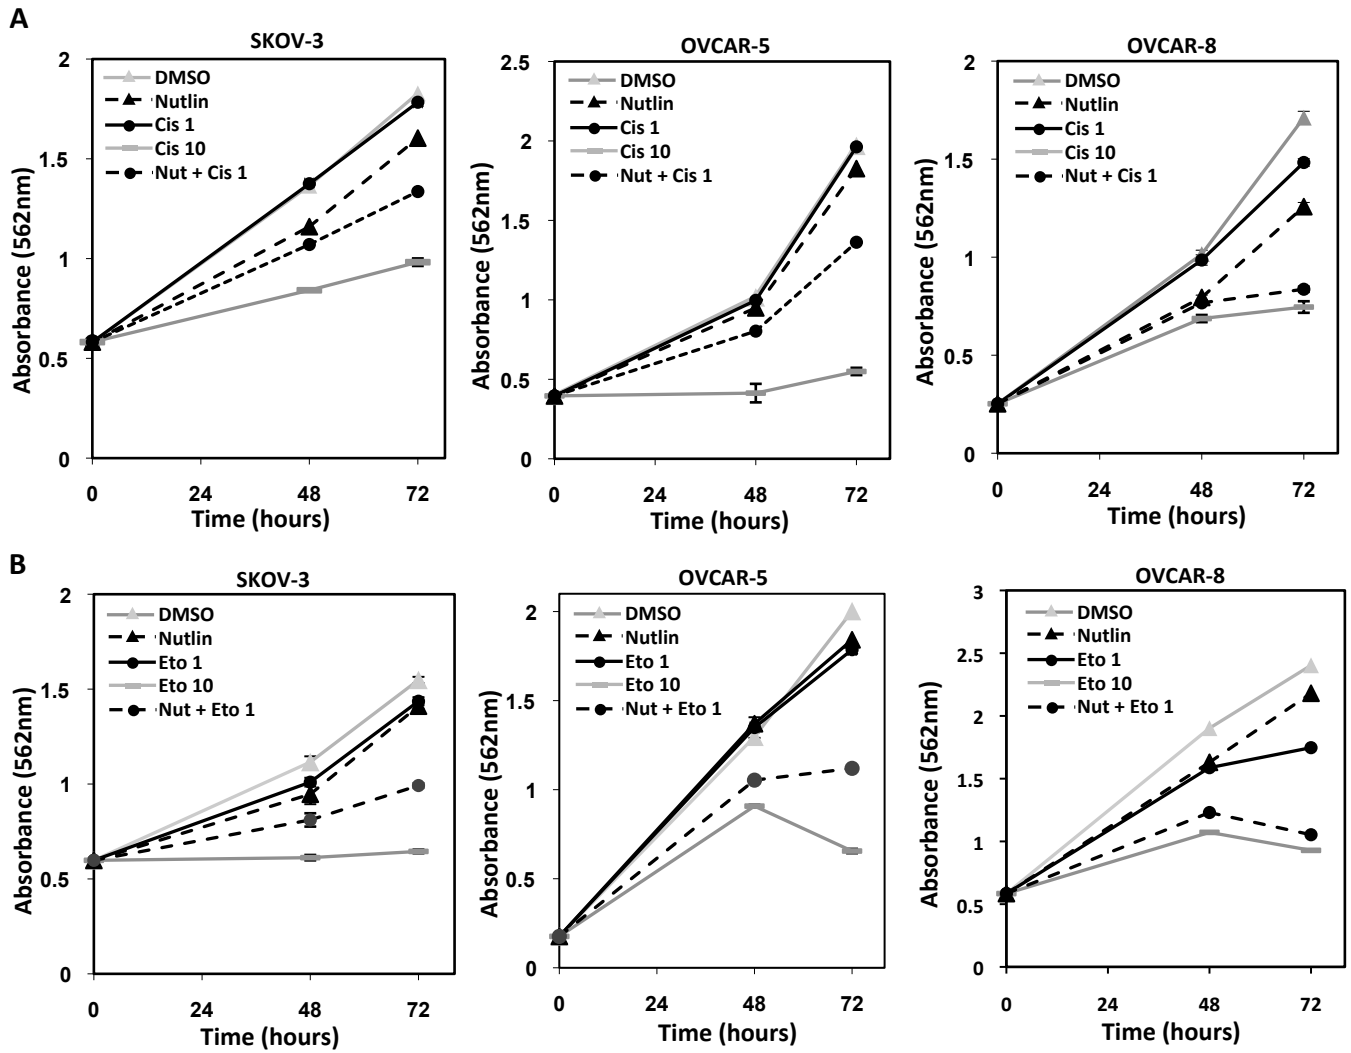

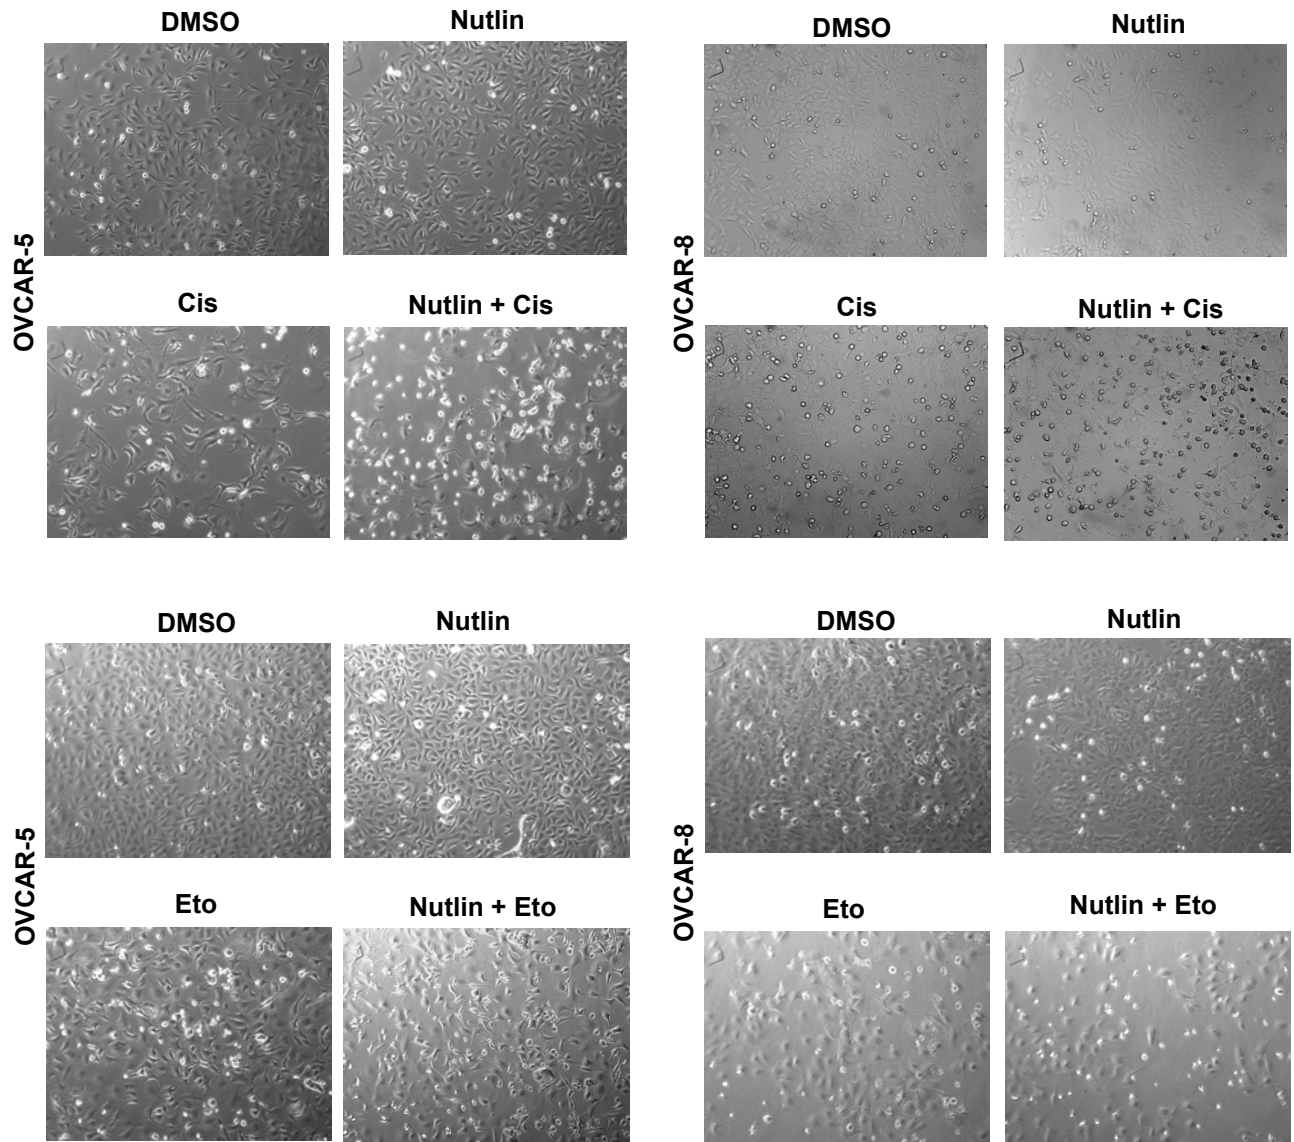

Supplement: NIHMS690606-supplement-1.pdf [file NIHMS690606-supplement-1.pdf]
